# Supplementary material for: The antiangiogenic role of the pro-inflammatory cytokine interleukin-31
Source: PubMed Central journal article supplement (PMC5369974; doi:10.18632/oncotarget.14857), 2017-01-27
Supplement: oncotarget-08-16430-s001.pdf [file oncotarget-08-16430-s001.pdf]

# The antiangiogenic role of the pro-inflammatory cytokine interleukin-31

## Supplementary Materials

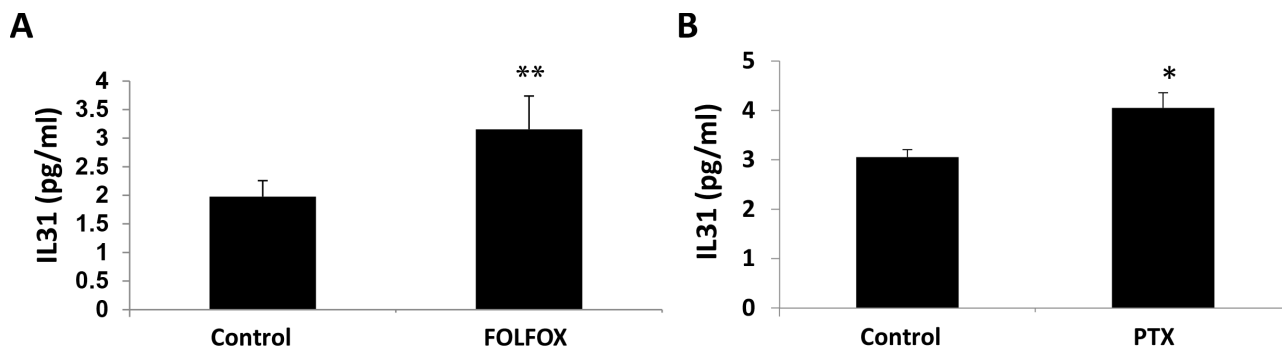

**Supplementary Figure 1: Increased expression of IL31 in the plasma and bone marrow cells of mice treated with chemotherapy.** Non tumor bearing BALB/c mice ( $n = 4$ ) were treated with either maximum tolerated dose of folinic acid/5-fluorouracil/oxaliplatin (FOLFOX) or paclitaxel (PTX) chemotherapy. After 24 hours (A) bone marrow cells were flushed from the femurs or (B) blood was obtained by cardiac puncture. Cell lysates and plasma, respectively, were evaluated for IL31 expression using ELISA. \*,  $0.05 > p > 0.01$ ; \*\* $p < 0.01$ .

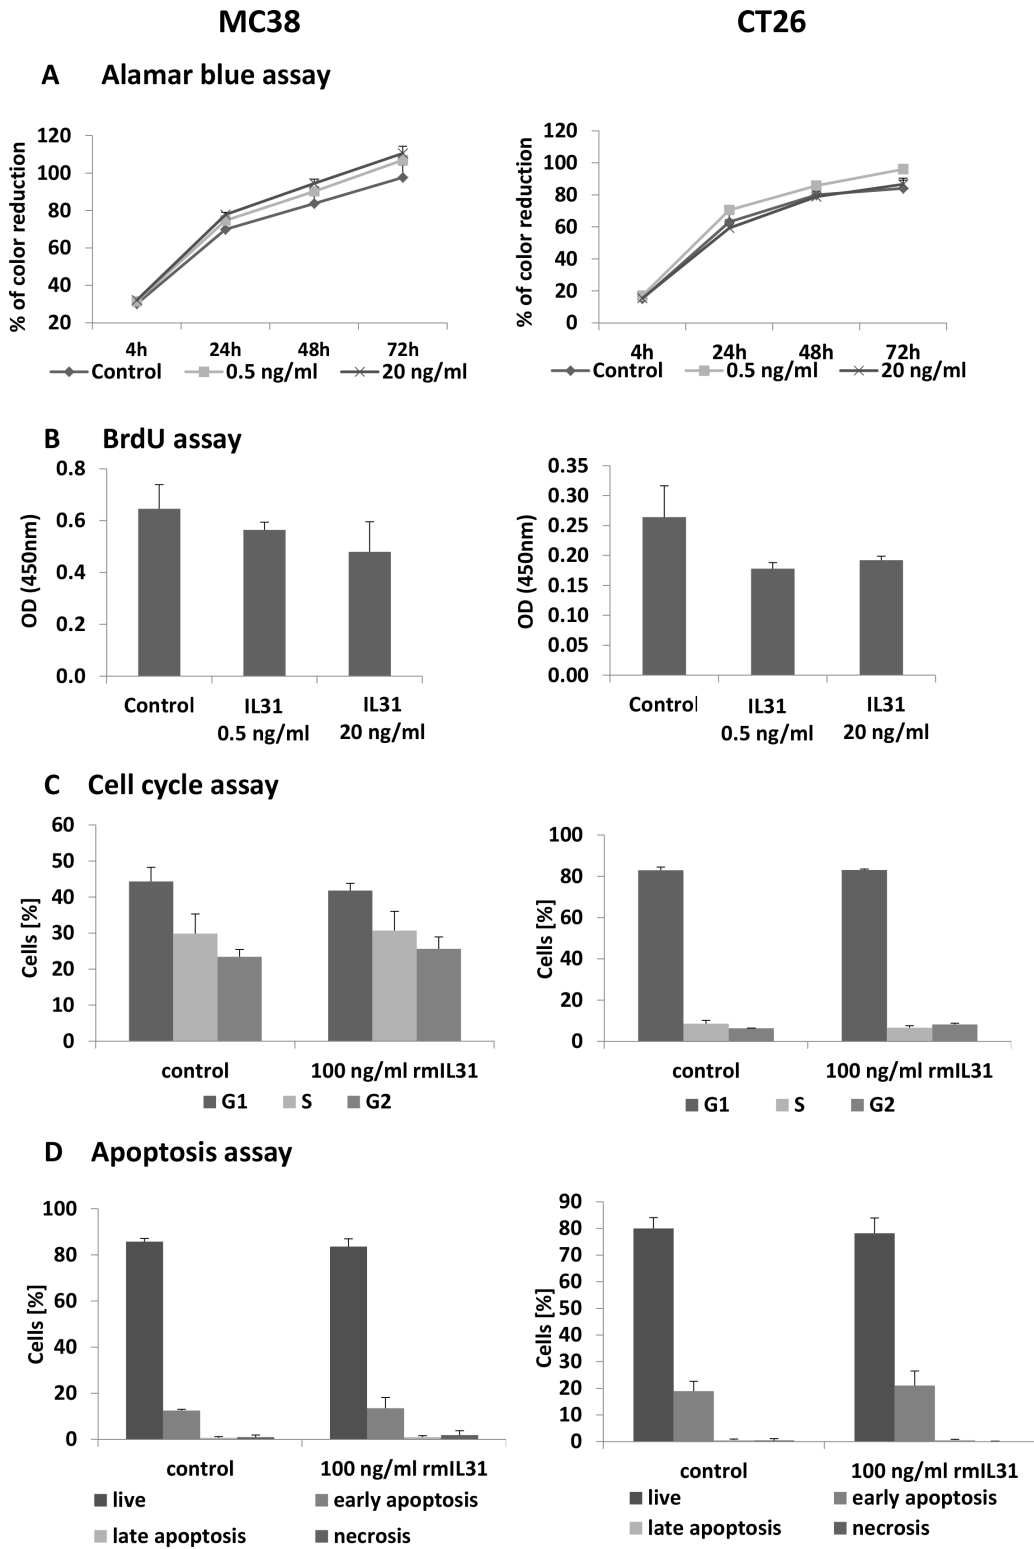

**Supplementary Figure 2: IL31 does not affect cell viability, proliferation, cell cycle, and apoptosis.** MC-38 and/or CT-26 murine colon carcinoma cells were evaluated for cell viability by Alamar Blue assay. (A) cell proliferation by BrdU (B) as well as cell cycle (C) and apoptosis (D) by flow cytometry. All assays are described in Materials and Methods. \*\*,  $0.01 > p > 0.001$ ; \*\*\*,  $p < 0.001$ .

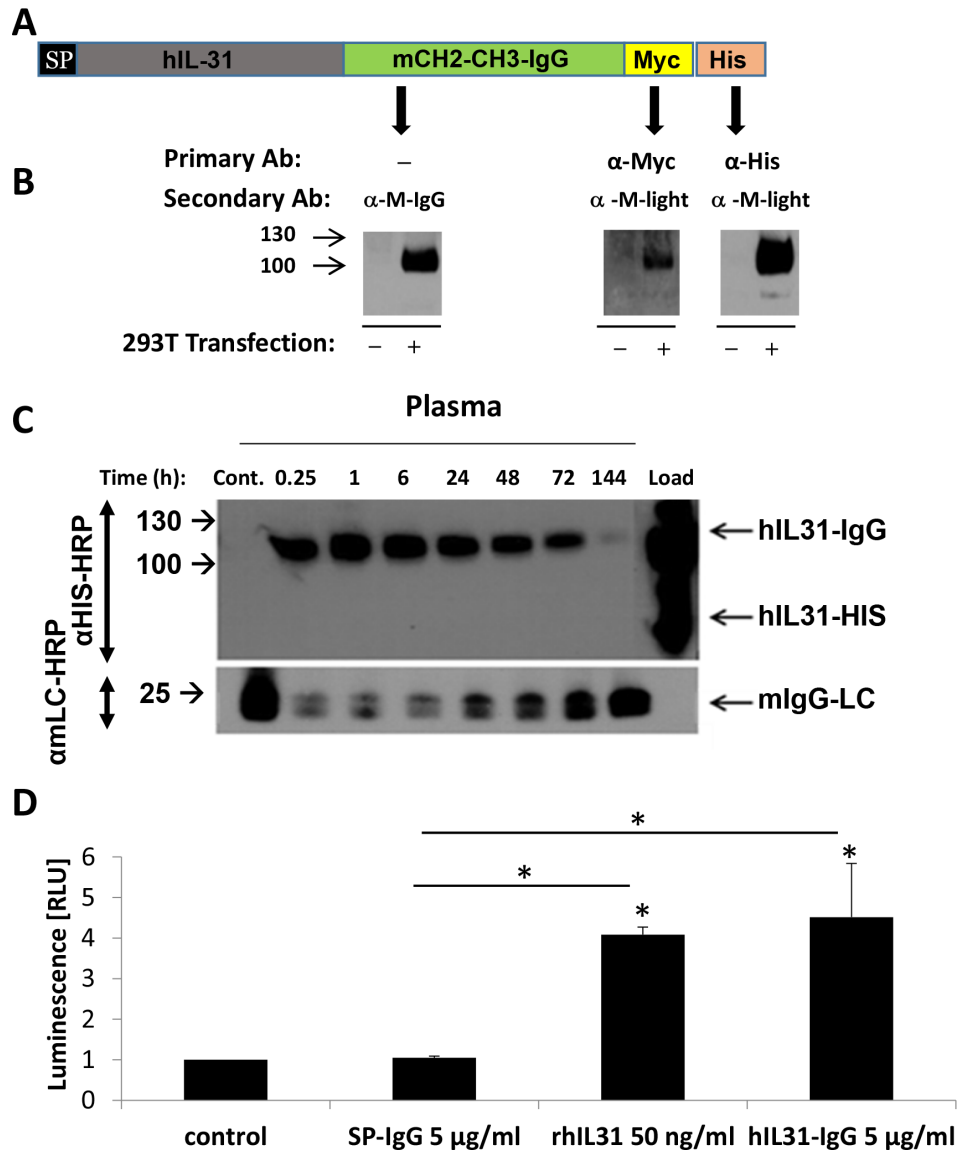

**Supplementary Figure 3: Generation of stabilized form of IL31.** (A) Illustration of the IL31-IgG construct: The DNA sequence of hIL31 protein with its signal peptide (SP) was synthesized and inserted into the NSPI expression vector. Mouse IgG1 heavy chain (hinge-CH2-CH3) was cloned downstream to hIL31 and upstream to myc-His6 tag. (B) HEK-293T cells were stably transfected with the IL31-IgG construct. Expression was verified by Western blot analysis using the indicated antibodies to identify the various components of the IL31-IgG fusion protein. (C) Eight-week old C57Bl/6 mice were intraperitoneally injected with a mixture of human IL31 (tagged with His) (30  $\mu$ g) and purified human IL31-IgG (200  $\mu$ g). Blood was drawn from the retro-orbital sinus at the indicated time points. Plasma was extracted and the presence of IL31 and IL31-IgG proteins was detected by Western blot using anti-His HRP conjugated antibodies. Mouse-IgG light chain served as a loading control. (D) U87 human glioblastoma cells were transfected with a STAT3 luciferase reporter plasmid. After 16 hours in serum-free medium, cells were cultured in the presence of rhIL31, IL31-IgG, or SP-IgG at the indicated concentrations for 6 hours. Cells were harvested and lysed. Luciferase substrate was added to cell lysates and bioluminescence was quantified. The experiment was performed in triplicate. \* $p < 0.05$ .

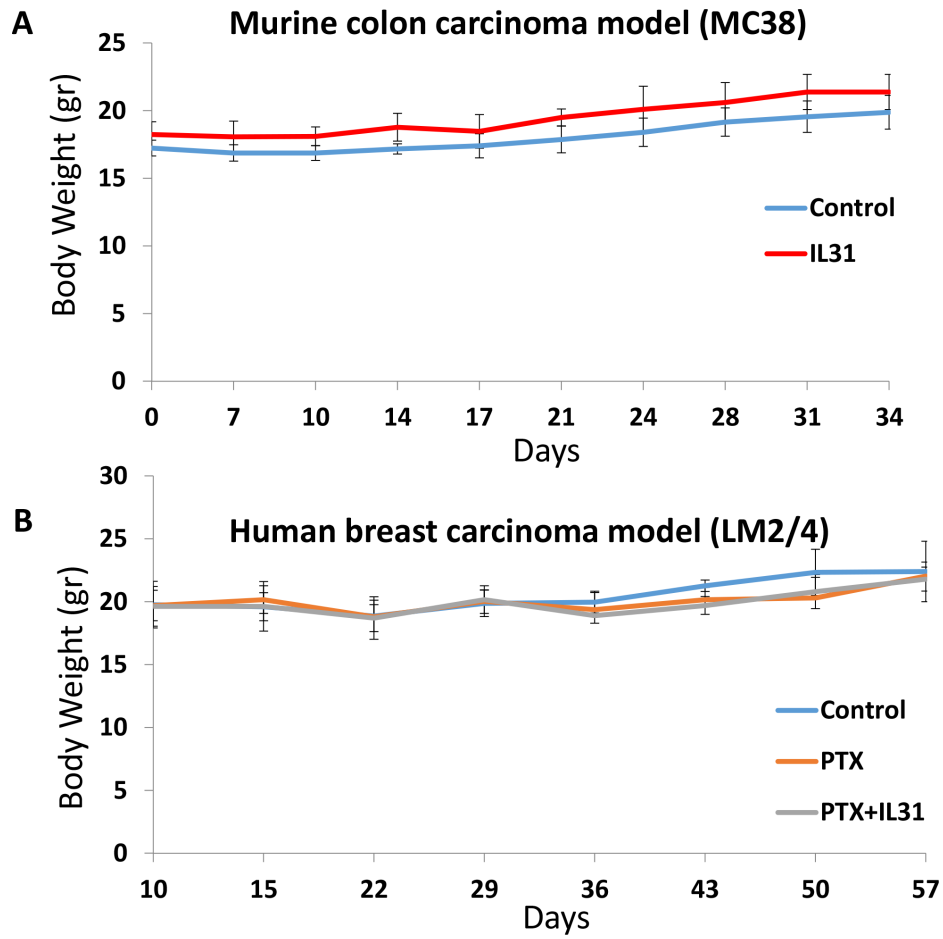

**Supplementary Figure 4: Body weight of mice treated with IL31.** (A) C57/bl mice bearing MC38 (from Figure 3D) or (B) NOD-SCID mice bearing LM2-4 (from Figure 7A) were monitored for their body weight during the treatment period. No significant difference was observed in body weight between the different treatment and control arms.
